# Supplementary material for: Omeprazole Administration in Preterm Preeclampsia: a Randomized Controlled Trial to Study Its Effect on sFlt-1 (Soluble Fms-Like Tyrosine Kinase-1), PlGF (Placental Growth Factor), and ET-1 (Endothelin-1)
Source: PubMed Central journal article supplement (PMC9093236; doi:10.1161/hypertensionaha.122.19070), 2022-04-28

**Omeprazole Administration in Preterm Preeclampsia: A Randomized Controlled Trial to Study its Effect on Soluble Fms-like Tyrosine Kinase-1, Placental Growth Factor and Endothelin-1.**

Rugina I. Neuman<sup>1,2</sup>, Milan D. Baars<sup>2</sup>, Langeza Saleh<sup>1,2</sup>, Michelle Broekhuizen<sup>1,3</sup>, Daan Nieboer<sup>4</sup>, Jérôme Cornette<sup>2</sup>, Sam Schoenmakers<sup>2</sup>, Michel Verhoeven<sup>5</sup>, Birgit C.P. Koch<sup>5</sup>, Henk Russcher<sup>6</sup>, Sjoerd A.A. van den Berg<sup>6,7</sup>, Anton H. van den Meiracker<sup>1</sup>, Willy Visser<sup>1,2</sup>, A.H. Jan Danser<sup>1</sup>

<sup>1</sup>Department of Internal Medicine, Division of Pharmacology and Vascular Medicine;

<sup>2</sup>Department of Obstetrics and Gynecology, Division of Obstetrics and Fetal Medicine;

<sup>3</sup>Department of Pediatrics, Division of Neonatology;

<sup>4</sup>Department of Biochemical Statistics;

<sup>5</sup>Department of Pharmacy;

<sup>6</sup>Department of Clinical Chemistry;

<sup>7</sup>Department of Internal Medicine, Division of Endocrinology,

Erasmus MC University Medical Center, Rotterdam, The Netherlands

**Corresponding author:**

Prof. dr. A.H.J. Danser

Department of Internal Medicine, Room Ee-1418B

Erasmus Medical Centre

P.O. Box 2040, 3000 CA Rotterdam, The Netherlands

Telephone number: 0031107043540

E-mail: a.danser@erasmusmc.nl

**SUPPLEMENTAL MATERIAL**

**Table S1. Characteristics of the patients whose Placentas were Perfused with No drug, Omeprazole or Esomeprazole.**

| <b>Characteristic</b>              | <b>No drug (n=6)</b> | <b>Omeprazole (n=5)</b> | <b>Esomeprazole (n=5)</b> |
|------------------------------------|----------------------|-------------------------|---------------------------|
| Maternal age, years                | 35 (34 - 36)         | 32 (28 - 33)            | 37 (35 - 38)              |
| Parity, n                          | 1 (1 - 1)            | 1 (0 - 1)               | 1 (1 - 1)                 |
| Caucasian Background, n            | 4                    | 2                       | 3                         |
| Body Mass index, kg/m <sup>2</sup> | 26 (24 - 30)         | 24 (22 - 25)            | 23 (22 - 25)              |
| Highest DBP, mmHg                  | 85 (73 - 88)         | 80 (75 - 85)            | 87 (75 - 89)              |
| Gestational age at delivery, weeks | 39 (38 - 39)         | 39 (38 - 39)            | 39 (39 - 39)              |
| Birth weight, grams                | 3502 (3377 - 3708)   | 3300 (2960 - 3555)      | 3738 (3685 - 3825)        |
| Birth weight percentile, grams     | 61 (55 - 77)         | 51 (28 - 71)            | 84 (82 - 90)              |
| Placental weight, grams            | 687 (653 - 743)      | 660 (494 - 680)         | 695 (645 - 727)           |
| Fetal sex (Female/Male)            | 4/2                  | 5/0                     | 5/0                       |

*Values are median (IQR) or number (%). DBP indicates diastolic blood pressure and GA, gestational age,*

**Table S2A. Baseline characteristics of 40 participants only included in the primary outcome.**

| <b>Characteristic</b>                   | <b>All patients</b> | <b>No Omeprazole group</b> | <b>Omeprazole group</b> | <b>P-Value</b> |
|-----------------------------------------|---------------------|----------------------------|-------------------------|----------------|
| N                                       | 40                  | 20                         | 20                      |                |
| Maternal age                            | 31.3 ( $\pm$ 5.8)   | 31.1 ( $\pm$ 6.2)          | 31.5 ( $\pm$ 5.6)       | 0.72           |
| GA at enrollment, weeks+days            | 30+2 [28+1 - 31+6]  | 29+1 [27+0 - 31+5]         | 30+4 [28+2 - 31+6]      | 0.30           |
| Pregestational BMI, kg/m <sup>2</sup>   | 26.4 (23.8 - 28.4)  | 26.5 ( $\pm$ 3.7)          | 25.1 ( $\pm$ 5.3)       | 0.22           |
| <b>Ethnic Background</b>                |                     |                            |                         |                |
| Caucasian/White                         | 23                  | 13 (65)                    | 10 (50)                 | NS             |
| Black/African/Creole                    | 9                   | 2 (10)                     | 7 (35)                  | NS             |
| Asian                                   | 1                   | 1 (5)                      | 0 (0)                   | NS             |
| Hindi/Pakistani                         | 3                   | 1 (5)                      | 2 (10)                  | NS             |
| Turkish/Morrocan                        | 1                   | 1 (5)                      | 0 (0)                   | NS             |
| Other                                   | 3                   | 2 (10)                     | 1 (5)                   | NS             |
| Nulliparous                             | 26                  | 14 (70)                    | 12 (60)                 | 0.51           |
| History of Preeclampsia/HELLP           | 6                   | 4 (20)                     | 2 (10)                  | 0.66           |
| Pre-existing hypertension               | 12                  | 7 (35)                     | 5 (25)                  | 0.73           |
| Pre-existing proteinuria                | 2                   | 1 (5)                      | 1 (5)                   | 1.00           |
| <b>Clinical findings at enrollment</b>  |                     |                            |                         |                |
| Systolic blood pressure, mmHg           | 140 (135 - 150)     | 140 (136 - 152)            | 140 (134 - 150)         | 0.48           |
| Diastolic blood pressure, mmHg          | 90 (84 - 95)        | 90 (84 - 95)               | 90 (81 - 95)            | 0.98           |
| Anti-hypertensive drug use              | 33                  | 17 (52)                    | 16 (49)                 | 1.00           |
| uPCR, mg/mmol                           | 54 (35 - 183)       | 52 (30 - 198)              | 69 (39 - 178)           | 0.51           |
| Creatinine, umol/L                      | 58 (51 - 64)        | 55 (51 - 64)               | 61 (53 - 68)            | 0.35           |
| Uric acid, mmol/L                       | 0.39 (0.23 - 0.35)  | 0.30 (0.29 - 0.36)         | 0.26 (0.20 - 0.35)      | 0.22           |
| ALT, U/L                                | 24 (15 - 42)        | 25 (16 - 53)               | 21 (12 - 33)            | 0.38           |
| Lactate dehydrogenase, U/L              | 213 (187 - 258)     | 203 (178 - 267)            | 216 (200 - 247)         | 0.86           |
| Platelet count, x10 <sup>9</sup> /L     | 227 (169 - 264)     | 219 (197 - 266)            | 236 (157 - 263)         | 0.80           |
| (partial) HELLP syndrome                | 3 (8)               | 1 (5)                      | 2 (10)                  | 1.00           |
| <b>Angiogenic Factors at Enrollment</b> |                     |                            |                         |                |
| sFlt-1, pg/mL                           | 9819 (3791 - 12767) | 10743 (4884 - 17834)       | 7110 (2633 - 11227)     | 0.11           |
| PlGF, pg/mL                             | 61 (39 - 199)       | 55 (36 - 92)               | 92 (40 - 340)           | 0.14           |
| sFlt-1/PlGF ratio                       | 160 (17 - 252)      | 208 (46 - 471)             | 118 (7 - 206)           | 0.08           |
| CT-proET-1, pmol/L                      | 64 (44 - 98)        | 59 (50 - 91)               | 86 (28 - 113)           | 0.79           |

*Values are mean ( $\pm$ SD), median (IQR) or number (%). GA indicates gestational age, HELLP; hemolysis, elevated liver enzymes and low platelets; uPCR, urinary protein-to-creatinin ratio; ALT, alanine transaminase; sFlt-1, soluble Fms-like tyrosine kinase-1; PlGF, placental growth factor; CT-proET-1, C-terminal preproendothelin-1.*

**Table S2B. Pregnancy outcomes according to treatment groups in the 40 participants included for primary outcome analysis.**

| <b>Characteristic</b>                               | <b>No Omeprazole (n = 20)</b> | <b>Omeprazole (n = 20)</b> | <b>P-Value</b> |
|-----------------------------------------------------|-------------------------------|----------------------------|----------------|
| Time to delivery, days                              | 22 (8 - 34)                   | 19 (8 - 39)                | 0.86           |
| GA at delivery, weeks+days                          | 32+5 (30 + 1 - 37 + 0)        | 33+4 (32 +1 - 36+6)        | 0.38           |
| Male/Female                                         | 12/8 (60/40)                  | 10/10 (50/50)              | 0.75           |
| Birth weight, grams                                 | 1669 ( $\pm$ 892)             | 1894 ( $\pm$ 744)          | 0.27           |
| <b>Maternal Outcomes</b>                            |                               |                            |                |
| Highest systolic blood pressure, mmHg               | 165 (156 - 177)               | 158 (150 - 180)            | 0.38           |
| Highest diastolic blood pressure, mmHg              | 105 (100 - 110)               | 103 (96 - 110)             | 0.74           |
| Highest urinary protein-to-creatinin ratio, mg/mmol | 85 (38 - 252)                 | 71 (43 - 286)              | 0.76           |
| Development of HELLP syndrome                       | 2 (10)                        | 1(5)                       | 1.00           |
| Need for magnesium sulphate during trial            | 9 (45)                        | 10 (50)                    | 0.75           |
| Need for intravenous antihypertensives during trial | 3 (15)                        | 4 (21)                     | 0.69           |
| Eclampsia                                           | 0(0)                          | 0(0)                       | 1.00           |
| Pulmonary edema                                     | 0 (0)                         | 1 (5)                      | 1.00           |
| Placental abruption                                 | 1 (5)                         | 0 (0)                      | 1.00           |
| Postpartum hemorrhage                               | 1 (5)                         | 1 (5)                      | 1.00           |
| Acute kidney injury                                 | 2 (10)                        | 0 (0)                      | 0.49           |
| <b>Neonatal outcomes</b>                            |                               |                            |                |
| Neonatal Intensive Care Unit admission              | 13 (65)                       | 11 (55)                    | 0.75           |
| Small-for-gestational age infant (percentile <10)   | 14 (70)                       | 10 (50)                    | 0.19           |
| Endotracheal intubation                             | 6 (30)                        | 1 (5)                      | 0.09           |
| Respiratory distress syndrome                       | 8 (40)                        | 6 (30)                     | 0.51           |
| Sepsis                                              | 3 (15)                        | 3 (15)                     | 1.00           |
| Necrotising enterocolitis                           | 1 (5)                         | 0 (0)                      | 1.00           |
| Fetal or neonatal death                             | 1 (5)                         | 0 (0)                      | 1.00           |

*Values are mean ( $\pm$ SD), median (IQR) or number (%). GA indicates gestational age, HELLP; hemolysis, elevated liver enzymes and low platelets; uPCR, urinary protein-to-creatinine ratio; NICU, neonatal intensive care unit.*

**Figure S1.** Flow diagram.

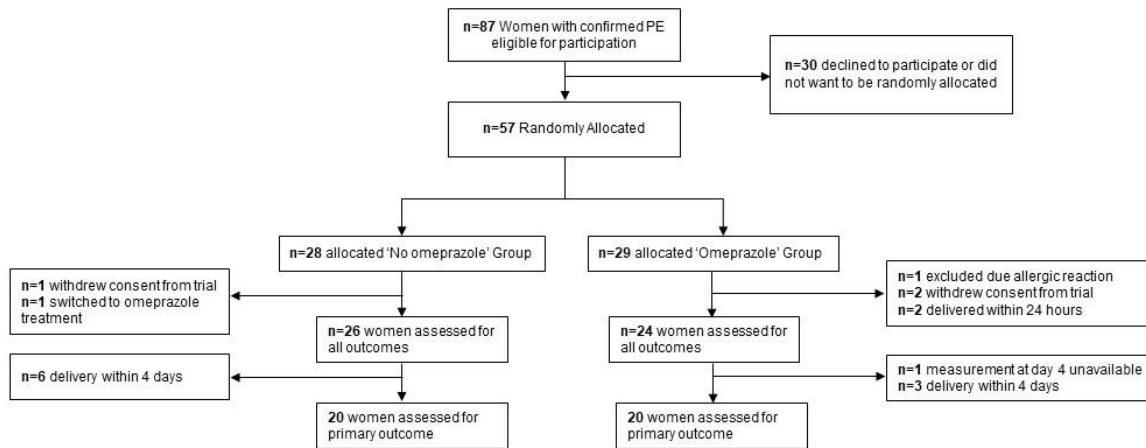

Supplement: hyp-79-1297-s001.pdf [file hyp-79-1297-s001.pdf]
